# Supplementary material for: Rationale and Design of the Vitamin D and Type 2 Diabetes (D2d) Study: A Diabetes Prevention Trial
Source: Oxford University Press journal article supplement (doi:10.2337/dc14-1005), 2014-09-10
Supplement: dc141005supplementarydata.pdf [file dc141005supplementarydata.pdf]

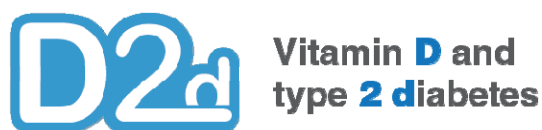

## Research Group

|                                                                                                                       |                                                                                                                                                                                                                                                                                                                                                                                                                                                                                  |
|-----------------------------------------------------------------------------------------------------------------------|----------------------------------------------------------------------------------------------------------------------------------------------------------------------------------------------------------------------------------------------------------------------------------------------------------------------------------------------------------------------------------------------------------------------------------------------------------------------------------|
| <b>D2d Coordinating Center</b> at Tufts Medical Center                                                                | Pittas, Anastassios (Study PI and Chair), Sheehan, Patricia (PM); Ware, James (Biostatistician); Nelson, Jason (Statistician); Fuss, Paul (Research Associate); Vickery, Ellen (Research Associate); Caravana, Erica (RA)                                                                                                                                                                                                                                                        |
| <b>D2d Central Laboratory</b> at University of Vermont                                                                | Lewis, Michael (PI); Tracy, Russell (Co-I); Boyle, Rebekah (PM); Cornell, Elaine (Laboratory Coordinator); Daunais, Patrick (QA/QC Manager); Lebrun, Lyndelle (Repository Manager); Nightingale, Sarah (Repository Manager); Bielsa, Lourdes (Laboratory Technician); Floersch, Melissa (Laboratory Technician); Gagne, Nicole (Laboratory Technician); Lanzer, Jessica (Laboratory Technician); Patnoad, Angela (Laboratory Technician); Powden, Cheryl (Laboratory Technician) |
| <b>D2d Drug Distribution Center</b> at VA Cooperative Studies Program, Clinical Research Pharmacy Coordinating Center | Hunt, Dave; Ringer, Robert                                                                                                                                                                                                                                                                                                                                                                                                                                                       |
| <b>D2d Collaborating Clinical Sites</b>                                                                               |                                                                                                                                                                                                                                                                                                                                                                                                                                                                                  |
| Atlanta VA Medical Center                                                                                             | Phillips, Lawrence (PI); Olson, Darin (Co-I); Rhee, Mary (Co-I); Wilson, Peter (Co-I); Adams, Cindy (RC); Adeel, Saira (RC); Michaels, Jennifer (RC); Mungara, Radhika (RC); Raines, Tasha (RC); Savoye, Louise (RC); Varughese, Rincy (RC)                                                                                                                                                                                                                                      |
| Baylor College of Medicine                                                                                            | Foreyt, John (PI); Balasubramanyam, Ashok (Co-I); Johnston, Craig (Co-I); Gee, Molly (RC); Moreno, Jennette (RC)                                                                                                                                                                                                                                                                                                                                                                 |
| Duke University Medical Center                                                                                        | Chatterjee, Ranee (PI); Edelman, David (Co-I); Green, Jennifer (Co-I); Chmielewski, Kathy (RC); Harrington, Lynn (RC); Hendrickson, Lori (RC); Patterson, Beth (RC); Suarez, Erica (RA)                                                                                                                                                                                                                                                                                          |
| Florida Hospital Translational Research Institute                                                                     | Pratley, Richard (PI); Clyatt, Julie (Co-I); Smith, Steven (Co-I); Jones, Amanda (RC); Nagel, Susann (RC)                                                                                                                                                                                                                                                                                                                                                                        |
| HealthPartners Research Foundation                                                                                    | Chadha, Chhavi (PI); Margolis, Karen (Co-I); Sperl-Hillen, JoAnn (Co-I); Cook, Shelly (RC); Fernandes, Omar (RC)                                                                                                                                                                                                                                                                                                                                                                 |
| University of Kansas Medical Center                                                                                   | Robbins, David (PI); Opole, Rebecca (Co-I); Lower, Erica (RC); Ouellette, Miranda (RC), Lewis, Virginia (PM); Alejandrez, Dulce (RA); Lavenbarg, Terri (Research Staff)                                                                                                                                                                                                                                                                                                          |
| Los Angeles Roybal Comprehensive Health Center                                                                        | Peters, Anne (PI); Ruelas, Valerie (RC); Dokhan, Sara (RA); Walker, Martha (RA)                                                                                                                                                                                                                                                                                                                                                                                                  |
| Maine Medical Center Research Institute                                                                               | Brodsky, Irwin (PI); Devlin, John (Co-I); Rosen, Clifford (Co-I); Brodsky, Lori (RC); Lapointe, Jaqueline (RC)                                                                                                                                                                                                                                                                                                                                                                   |
| MedStar Health Research Institute                                                                                     | Aroda, Vanita (PI); Getaneh, Asqual (Co-I); Umans, Jason (Co-I); Shepard, Mark (Co-I); Evans, Ernest (RC); Lindsay, Milajurine (Co-I), Angelia Clark-Green (Research Staff); Ghazi, Adline, MD (Co-I), Park, Jean, MD (Co-I)                                                                                                                                                                                                                                                     |
| University of Nebraska Medical Center                                                                                 | Desouza, Cyrus (PI); Anderson, Robert (Co-I); Drincic, Andjela (Co-I); Shivaswamy, Vijay (Co-I); Heineman, Robert (RC); Pfeifer, James (RC); Rodriguez, Maria (RC); Severson, Megan (RC); Jeff Newcomb (RC)                                                                                                                                                                                                                                                                      |
| Beth Israel Medical Center                                                                                            | Poretzky, Leonid (PI); Busta, Agustin (Co-I); Cadag, Stefan (Co-I); Krymskaya, Marina (Co-I); Liao, Emilia (Co-I); Patel, Ronak (Co-I); Hassan, Mahmoud (RC); Mantha-Thaler, Kamala (RC)                                                                                                                                                                                                                                                                                         |
| NIDDK                                                                                                                 | Staten, Myrlene (Program Scientist); Malozowski, Saul (Program Official)                                                                                                                                                                                                                                                                                                                                                                                                         |

## SUPPLEMENTARY DATA

|                                                 |                                                                                                                                                                                                                        |
|-------------------------------------------------|------------------------------------------------------------------------------------------------------------------------------------------------------------------------------------------------------------------------|
| Northwestern University                         | Neff, Lisa (PI); Hahr, Allison (Co-I); Molitch, Mark (Co-I); Sullivan, Margaret (RC); Zeiss, Dinah (RC); Lewandowski, Jennifer                                                                                         |
| Pennington Biomedical Research Center           | Bray, George (PI); Greenway, Frank (Co-I); Hsia, Daniel (Co-I); Haynes, Natalie (RC); Shipp, Mandy (RC); Thomassie, Amy (RC), Claire Hazlett (Research Staff),                                                         |
| Medical University of South Carolina            | O'Neil, Patrick (PI); Holes-Lewis, Kelly (Co-I); Malcolm, Robert (Co-I); Kuker, Suzanne (RC), Ascanio, Rhoda (Research Staff); Kneece, Valerie (RA)                                                                    |
| Stanford University Medical Center              | Kim, Sun (PI); Gardner, Christopher (Co-I); Hau, Josephine (RC), Grove; Kaylene (RA)                                                                                                                                   |
| University of Tennessee Health Science Center   | Johnson, Karen (PI); Coday, Mace (Co-I); Womack, Catherine (Co-I); Caufield, Margaret (RC); Griffin, Beate (RC); Jones, Lisa (RC); McGhee, Miranda (RC); Fonda, Brenda (Research Staff); Rogers-Phillips, Katrina (RA) |
| Tufts Medical Center                            | Pittas, Anastassios (PI); Alzahrani, Saud (Co-I); Dawson-Hughes, Bess (Co-I);; Gunn, Sarah (RC), Tam, Idy (RC); Dabenigno, Paula (Research Staff Rhoda), Murphy, Catherine (Research Staff)                            |
| University of Texas Southwestern Medical Center | Raskin, Philip (PI); Maalouf, Naim (Co-I); Rhee, Chanhaeng (Co-I); Brightman, Brenda (RC); Noryan, Tatyana (RC); Schnurr-Breen, Laura (RC)                                                                             |
| Center for Health Research Kaiser Permanente NW | LeBlanc, Erin (PI); Hillier, Teresa (Co-I); Jones, Suzanne (RC); Fulton, Lucy (RC)                                                                                                                                     |
| Cleveland Clinic                                | Kashyap, Sangeeta (PI); Misra-Herbert, Anita (Co-I); Hatipoglu, Betul (Co-I); Orasko, Amy (RC); Surkla, Ana (RC)                                                                                                       |

PI= Principal Investigator; Co-I= Co-Investigator; RC= Research Coordinator; RA= Research Assistant; PM= Project Manager
